# Supplementary material for: Catalytic depolymerization of calcium lignosulfonate to high-value oxygenated aromatic compounds over the efficient Fe2O3-La0.8Sr0.2FeO3
Source: Royal Society of Chemistry journal article supplement (doi:10.1039/d3se00912b), 2023-01-01
Supplement: d3se00912b1.pdf [file d3se00912b1.pdf]

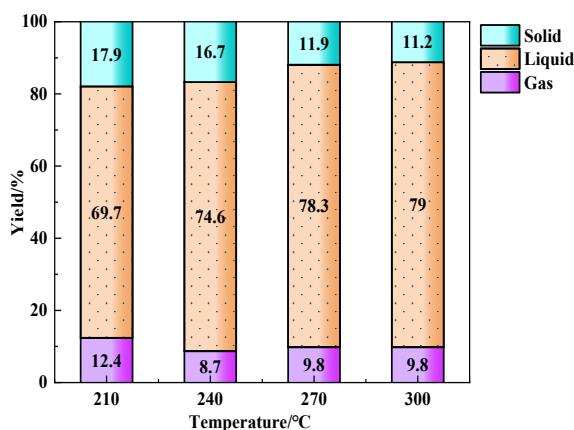

**Fig.S1** Three-phase product yield distribution of depolymerization of CLS by  $\text{Fe}_2\text{O}_3\text{-La}_{0.8}\text{Sr}_{0.2}\text{FeO}_3$

$\text{La}_{0.8}\text{Sr}_{0.2}\text{FeO}_3$  at different temperatures

For the catalytic experiment, the other depolymerization temperatures of calcium lignosulfonate was analyzed in the conditional experiment of our previous studies, such as 210°C, 240°C, 270°C, and 300°C. It could be obviously seen in **Fig. S1**, when the depolymerization temperature was 300°C, the yield of liquid phase products was almost as large as that of 270°C, but considering the cost and energy consumption, the optimal depolymerization temperature of CLS was 270°C.

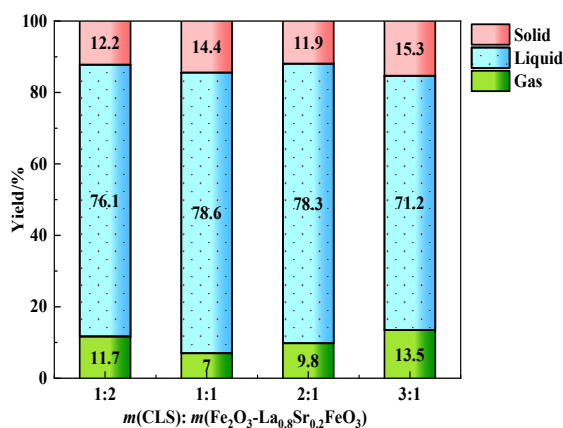

**Fig. S2** Three-phase product yields for CLS depolymerization with various mass ratios of

$\text{Fe}_2\text{O}_3\text{-La}_{0.8}\text{Sr}_{0.2}\text{FeO}_3$  catalyst to CLS

During the catalytic depolymerization, the mass ratio of  $\text{Fe}_2\text{O}_3\text{-La}_{0.8}\text{Sr}_{0.2}\text{FeO}_3$

catalyst to CLS was optimized with the value of 1:2, 1:1, 2:1, and 3:1. According to the results in **Fig. S2**, it could be seen that the liquid-phase product yield was 78.6% when  $m(\text{CLS}):m(\text{Fe}_2\text{O}_3\text{-La}_{0.8}\text{Sr}_{0.2}\text{FeO}_3)$  1:1, and 78.3% at 2:1. With the increasing of catalyst mass, the liquid-phase product yield at 3:1 decreased to 71.2%. From the perspective of catalytic efficiency and the production of more liquid products, the 2:1 value was selected to be the appropriate proportion in the following experiments.

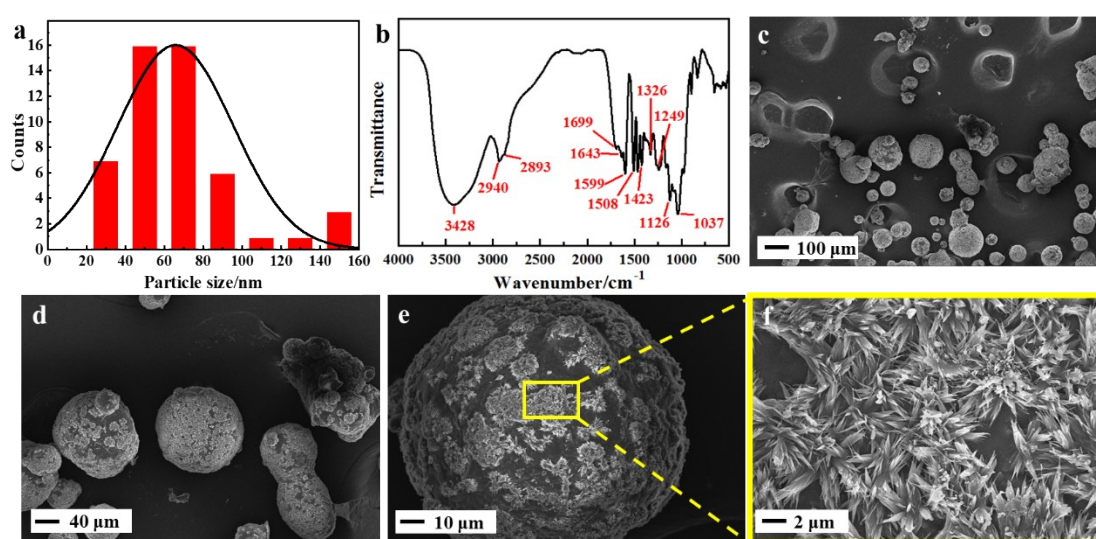

**Fig. S3** Particle size distribution (a), FT-IR spectra (b), and SEM images (c-f) of CLS

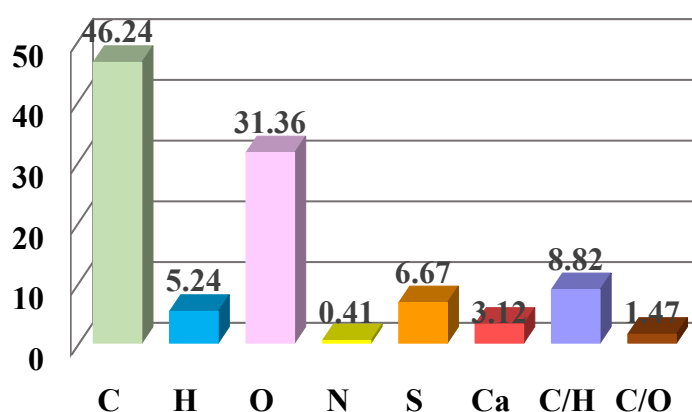

**Fig. S4** Elemental analysis of calcium lignosulfonate

**Table S1** The orthogonal results of Fe<sub>2</sub>O<sub>3</sub> crystals

| NO. | Ferric Salt                                     | Precipitant                       | pH     | Temperature | RC <sup>a</sup> /% |
|-----|-------------------------------------------------|-----------------------------------|--------|-------------|--------------------|
| 1   | Fe(NO <sub>3</sub> ) <sub>3</sub>               | NaOH                              | 9      | 160         | 51.15%             |
| 2   | FeCl <sub>3</sub>                               | NH <sub>3</sub> ·H <sub>2</sub> O | 5      | 160         | 49.83%             |
| 3   | Fe <sub>2</sub> (SO <sub>4</sub> ) <sub>3</sub> | Na <sub>2</sub> CO <sub>3</sub>   | 7      | 160         | 55.96%             |
| 4   | Fe(NO <sub>3</sub> ) <sub>3</sub>               | Na <sub>2</sub> CO <sub>3</sub>   | 5      | 180         | 44.23%             |
| 5   | Fe <sub>2</sub> (SO <sub>4</sub> ) <sub>3</sub> | NH <sub>3</sub> ·H <sub>2</sub> O | 9      | 180         | 38.11%             |
| 6   | FeCl <sub>3</sub>                               | NaOH                              | 7      | 180         | 44.86%             |
| 7   | FeCl <sub>3</sub>                               | Na <sub>2</sub> CO <sub>3</sub>   | 9      | 200         | 96.14%             |
| 8   | Fe(NO <sub>3</sub> ) <sub>3</sub>               | NH <sub>3</sub> ·H <sub>2</sub> O | 7      | 200         | 34.28%             |
| 9   | Fe <sub>2</sub> (SO <sub>4</sub> ) <sub>3</sub> | NaOH                              | 5      | 200         | 59.55%             |
| k1  | 43.22%                                          | 51.85%                            | 51.20% | 52.31%      |                    |
| k2  | 63.61%                                          | 40.74%                            | 45.03% | 42.40%      |                    |
| k3  | 51.21%                                          | 70.55%                            | 61.80% | 63.32%      |                    |
| R   | 20.39%                                          | 29.81%                            | 16.77% | 20.92%      |                    |

<sup>a</sup> Relative crystallinity (RC) was calculated from Jade software.

**Table S2** The selectivity of liquid-phase products via the depolymerization of CLS

| Type                                                         | Selectivity of liquid-phase product/wt. % |                                |         |         |         |                                                      |
|--------------------------------------------------------------|-------------------------------------------|--------------------------------|---------|---------|---------|------------------------------------------------------|
|                                                              | S2                                        | S2                             | S1      | S2      | S3      | S2                                                   |
| Solvent system                                               |                                           |                                |         |         |         |                                                      |
| Catalyst                                                     | None                                      | Fe <sub>2</sub> O <sub>3</sub> | LSF-1.0 | LSF-1.0 | LSF-1.0 | La <sub>0.8</sub> Sr <sub>0.2</sub> FeO <sub>3</sub> |
| <b>Ester</b>                                                 | 15.64                                     | 17.23                          | 25.52   | 14.98   | 14.94   | 22.66                                                |
| <b>Aromatic</b>                                              | 0.70                                      | 5.01                           | 5.72    | 6.35    | 4.75    | 3.84                                                 |
| <b>Guaiacol</b>                                              | 8.79                                      | 8.63                           | 10.94   | 20.76   | 17.75   | 15.82                                                |
| <b>Syringin</b>                                              | 15.60                                     | 20.34                          | 13.24   | 27.19   | 24.37   | 13.86                                                |
| <b>Phenol</b>                                                | 13.98                                     | 9.04                           | 13.72   | 11.46   | 10.33   | 7.08                                                 |
| <b>Ether</b>                                                 | 1.22                                      | 0.40                           | 0.60    | 1.38    | 1.32    | 0.80                                                 |
| <b>Others</b>                                                | 44.07                                     | 39.35                          | 30.26   | 17.88   | 26.54   | 35.94                                                |
| <b>Total selectivity of aryl oxygen-containing compounds</b> | 40.29                                     | 43.42                          | 44.22   | 67.14   | 58.52   | 41.40                                                |

**Table S3** The functional groups of the liquid-phase product

| <b>Number</b> | <b>Wave length/cm<sup>-1</sup></b> | <b>Functional group</b>                                |
|---------------|------------------------------------|--------------------------------------------------------|
| 1             | 2991                               | C-H stretching vibration band                          |
| 2             | 1737                               | Non-conjugated carbonyl C=O stretching vibration band  |
| 3             | 1641                               | Conjugated carbonyl C=O stretching vibration band      |
| 4             | 1375                               | Phenolic hydroxyl -OH stretching vibration band        |
| 5             | 1246                               | Guaiac-based and C=O stretching vibration band         |
| 6             | 1107                               | Syringyl                                               |
| 7             | 1049                               | C-H plane deformation vibrations on the aromatic rings |
